# Supplementary material
Source: MDPI journal article supplement (https://www.mdpi.com/2311-5637/4/4/97)
Supplement: s1 [file s1]

Figure S1 shows the evolution of concentration of glucose, xylose, biomass, acetic acid, xylitol, and ethanol in the single-aeration-stage.

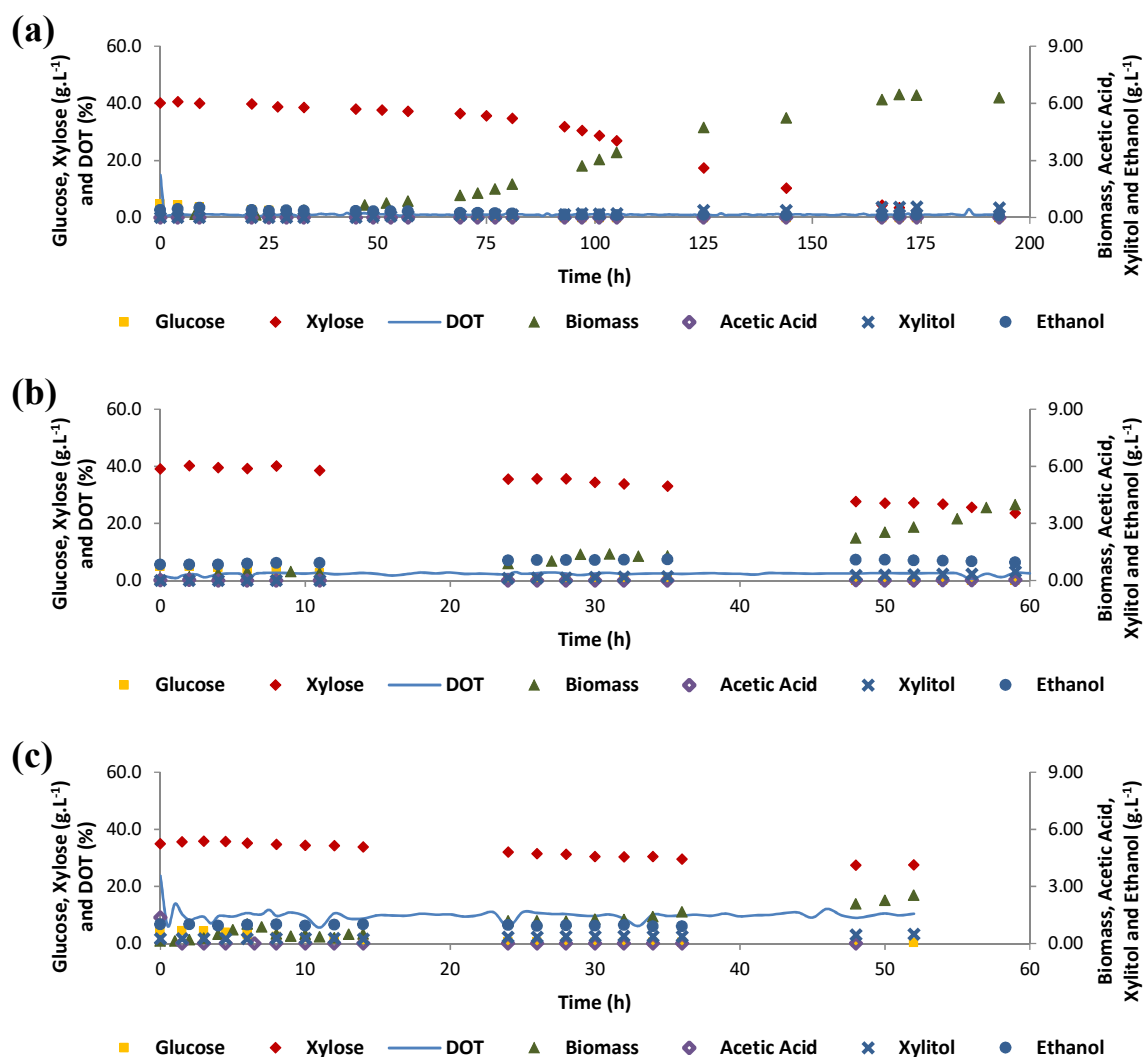

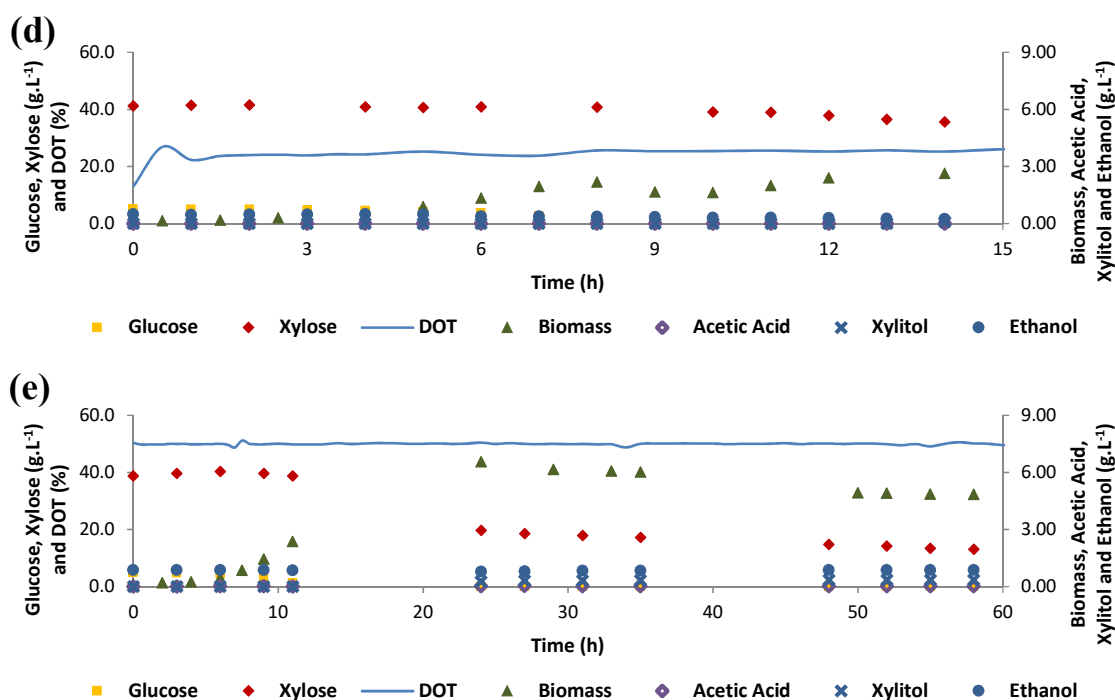

**Figure S1.** Single-aeration-stage experiments in synthetic medium: (a) DOT 1%; (b) DOT 2.5%; (c) DOT 10%; (d) DOT 25%; (e) DOT 50%.

Figure S2 shows the fitting of Monod kinetic equation (2) to the experimental data of  $\mu$  (h<sup>-1</sup>) versus DOT (%). The maximum specific growth rate as function of DOT,  $\mu_{MAX}$  (h<sup>-1</sup>) was  $0.45 \pm 0.01$  h<sup>-1</sup> and the saturation constant for oxygen,  $K_{O_2}$  (%), was  $0.67 \pm 0.13\%$ , with a correlation coefficient ( $R^2$ ) of 0.95. The  $\mu_{MAX}$  corresponded to the maximum specific growth rate when the system is saturated with oxygen [S1], thereby corresponded, under the culture conditions studied, to the highest specific growth rate that can be obtained for *S. stipitis* C4. In turn,  $K_{O_2}$  is an indicator of *S. stipitis* C4 affinity for oxygen [S1], thus it shows a high affinity of *S. stipitis* C4 for oxygen, because even at a DOT value so reduced as  $0.67 \pm 0.13\%$  half of the  $\mu_{MAX}$  is obtained. Slininger et al. [S2] studied the variation of the specific growth rate of *S. stipitis* as function of dissolved oxygen concentration and obtained a  $\mu_{MAX}$  of 0.54 h<sup>-1</sup>, which was higher than the value of  $\mu_{MAX}$  obtained in the present study. However, the higher  $\mu_{MAX}$  obtained by these authors is probably owing to the fact that their study was conducted in 40 g.L<sup>-1</sup> of xylose, instead of 5 g.L<sup>-1</sup> of glucose and 40 g.L<sup>-1</sup> of xylose, since maximum specific growth rate depends on both the number of substrates used and its respective concentration [S2–S5]. In the DOT 50% experiment a  $\mu_{max}$  of 0.44 h<sup>-1</sup> was obtained, which was close to the  $\mu_{MAX}$  value. Thus, the DOT value of 50% was high enough to obtain a  $\mu$  very close to the highest specific growth rate that can be achieved under the culture conditions studied.

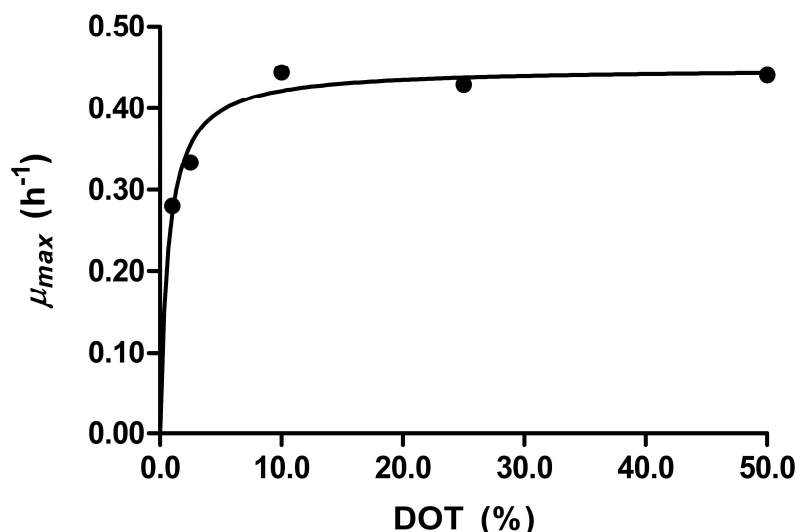

**Figure S2.** Fitting of Monod model to experimental data of  $\mu$  (h<sup>-1</sup>) versus DOT (%) by non-linear regression using GraphPad Prism® 5 software. The correlation coefficient ( $R^2$ ) was 0.95.

## References

- S1. Stanbury, P.F.; Whitaker, A.; Hall, S.J. *Principles of fermentation technology: Third edition*. Elsevier Inc.: 2016; p 1-803.
- S2. Slininger, P.J.; Branstrator, L.E.; Bothast, R.J.; Okos, M.R.; Ladisch, M.R. Growth, death, and oxygen uptake kinetics of *pichia stipitis* on xylose. *Biotechnology and Bioengineering* **1991**, *37*, 973-980.
- S3. Agbogbo, F.K.; Coward-Kelly, G.; Torry-Smith, M.; Wenger, K.S. Fermentation of glucose/xylose mixtures using *pichia stipitis*. *Process Biochemistry* **2006**, *41*, 2333-2336.
- S4. Lee, T.Y.; Kim, M.D.; Kim, K.Y.; Park, K.; Ryu, Y.W.; Seo, J.H. A parametric study on ethanol production from xylose by *pichia stipitis*. *Biotechnology and Bioprocess Engineering* **2000**, *5*, 27-31.
- S5. du Preez, J.C.; Bosch, M.; Prior, B.A. Xylose fermentation by *candida shehatae* and *pichia stipitis*: Effects of pH, temperature and substrate concentration. *Enzyme and Microbial Technology* **1986**, *8*, 360-364.
